# Supplementary material for: A study of volatility by composition, heating, and dilutionmeasurements of secondary organic aerosol from 1,3,5-trimethylbenzene
Source: Copernicus journal article supplement (doi:10.5194/acp-2018-1291), 2019-01-16
Supplement: Supplementary file 1 [file acp-2018-1291-supplement.pdf]

*Supplement of*

**A study of volatility by composition, dilution, and heating measurements  
of secondary organic aerosol from 1,3,5-trimethylbenzene**

Kei Sato et al.

*Correspondence to:* Kei Sato (kei@nies.go.jp)

Table S1. Initial concentration condition, mass concentration of produced SOA, geometric mean size of produced SOA, and analytical methods employed in each experimental run.

| Run | [HC] <sub>0</sub><br>ppm | [NO] <sub>0</sub><br>ppm | [CH <sub>3</sub> ONO] <sub>0</sub><br>ppm | [SOA] <sup>b</sup><br>μg m <sup>-3</sup> | Size<br>nm | Measurements <sup>c</sup> | Comment                  |
|-----|--------------------------|--------------------------|-------------------------------------------|------------------------------------------|------------|---------------------------|--------------------------|
| 1   | 1.48                     | 1.09                     | 0.01                                      | 192                                      | 395        | TD-AMS, LC/MS, PTR-MS     |                          |
| 2   | 1.48                     | 1.19                     | 0.01                                      | 228                                      | 558        | TD-AMS, LC/MS, PTR-MS     | Aging expt. <sup>a</sup> |
| 3   | 1.50                     | 1.21                     | 0.01                                      | 203                                      | 364        | TD-AMS, EDC (DR = 19.6)   |                          |
| 4   | 1.53                     | 1.21                     | 0.01                                      | 182                                      | 391        | TD-AMS, EDC (DR = 40.3)   |                          |
| 5   | 1.52                     | 1.20                     | 0.01                                      | 184                                      | 391        | TD-AMS, EDC (DR = 63.4)   |                          |
| 6   | 1.49                     | 1.20                     | 0.01                                      | 171                                      | 393        | TD-AMS, EDC (DR = 86.1)   |                          |
| 7   | 1.51                     | 1.18                     | 0.01                                      | 254                                      | 408        | flow diluter              |                          |

<sup>a</sup> SOA formed from the TMB photooxidation was exposed to OH radicals. <sup>b</sup> Calculated from the volume concentration by assuming particle density to 1.40 g·cm<sup>-3</sup> (present study). <sup>c</sup> EDC is external dilution chamber, DR is dilution ratio.

Table S2. Measured mass-to-charge ratio ( $m/z$ ), suggested ion formula, calculated molecular weight (MW), measured total intensities of extracted ion chromatogram (EIC) peaks, calculated O/C ratio, and predicted saturation concentrations for products existing in SOA from TMB.

| $m/z$   | Ion formula                                       | MW      | Total int. of EIC peaks (normal, run 1) | Total int. of EIC peaks (aging, run 2) | O/C  | $\log_{10} C^*$ (line fitted to molecular corridor) | $\log_{10} C^*$ (eq. by Li et al., 2016) |
|---------|---------------------------------------------------|---------|-----------------------------------------|----------------------------------------|------|-----------------------------------------------------|------------------------------------------|
| 185.042 | C <sub>6</sub> H <sub>10</sub> O <sub>5</sub> Na  | 162.053 | 33,796                                  | 62,479                                 | 0.83 | 3.77                                                | 3.43                                     |
| 193.047 | C <sub>8</sub> H <sub>10</sub> O <sub>4</sub> Na  | 170.058 | 138,991                                 | 134,015                                | 0.50 | 3.43                                                | 4.10                                     |
| 197.042 | C <sub>7</sub> H <sub>10</sub> O <sub>5</sub> Na  | 174.053 | 57,574                                  | 97,423                                 | 0.71 | 3.26                                                | 3.28                                     |
| 207.063 | C <sub>9</sub> H <sub>12</sub> O <sub>4</sub> Na  | 184.074 | 394,346                                 | 425,366                                | 0.44 | 2.83                                                | 3.81                                     |
| 209.078 | C <sub>9</sub> H <sub>14</sub> O <sub>4</sub> Na  | 186.089 | 1,339,087                               | 917,440                                | 0.44 | 2.75                                                | 3.81                                     |
| 213.037 | C <sub>7</sub> H <sub>10</sub> O <sub>6</sub> Na  | 190.048 | 78,894                                  | 66,442                                 | 0.86 | 2.58                                                | 2.11                                     |
| 215.053 | C <sub>7</sub> H <sub>12</sub> O <sub>6</sub> Na  | 192.063 | 149,163                                 | 212,665                                | 0.86 | 2.49                                                | 2.11                                     |
| 223.058 | C <sub>9</sub> H <sub>12</sub> O <sub>5</sub> Na  | 200.068 | 337,888                                 | 362,721                                | 0.56 | 2.15                                                | 2.85                                     |
| 223.094 | C <sub>10</sub> H <sub>16</sub> O <sub>4</sub> Na | 200.105 | 52,609                                  | 30,785                                 | 0.40 | 2.15                                                | 3.50                                     |
| 225.073 | C <sub>9</sub> H <sub>14</sub> O <sub>5</sub> Na  | 202.084 | 1,902,497                               | 2,852,655                              | 0.56 | 2.07                                                | 2.85                                     |
| 227.053 | C <sub>8</sub> H <sub>12</sub> O <sub>6</sub> Na  | 204.063 | 127,216                                 | 263,746                                | 0.75 | 1.98                                                | 1.97                                     |
| 239.053 | C <sub>9</sub> H <sub>12</sub> O <sub>6</sub> Na  | 216.063 | 61,399                                  | 99,896                                 | 0.67 | 1.47                                                | 1.79                                     |
| 239.089 | C <sub>10</sub> H <sub>16</sub> O <sub>5</sub> Na | 216.100 | 614,689                                 | 390,379                                | 0.50 | 1.47                                                | 2.59                                     |
| 241.068 | C <sub>9</sub> H <sub>14</sub> O <sub>6</sub> Na  | 218.079 | 1,500,300                               | 1,673,638                              | 0.67 | 1.39                                                | 1.79                                     |
| 243.084 | C <sub>9</sub> H <sub>16</sub> O <sub>6</sub> Na  | 220.095 | 1,081,863                               | 1,371,867                              | 0.67 | 1.30                                                | 1.79                                     |
| 245.078 | C <sub>12</sub> H <sub>14</sub> O <sub>4</sub> Na | 222.089 | 1,077,603                               | 1,120,068                              | 0.33 | 1.22                                                | 2.83                                     |
| 253.105 | C <sub>11</sub> H <sub>18</sub> O <sub>5</sub> Na | 230.115 | 115,520                                 | 114,146                                | 0.45 | 0.87                                                | 2.30                                     |
| 255.084 | C <sub>10</sub> H <sub>16</sub> O <sub>6</sub> Na | 232.095 | 142,174                                 | 116,783                                | 0.60 | 0.79                                                | 1.58                                     |
| 257.063 | C <sub>9</sub> H <sub>14</sub> O <sub>7</sub> Na  | 234.074 | 127,222                                 | 198,565                                | 0.78 | 0.71                                                | 0.66                                     |
| 259.079 | C <sub>9</sub> H <sub>16</sub> O <sub>7</sub> Na  | 236.090 | 180,451                                 | 189,460                                | 0.78 | 0.62                                                | 0.66                                     |
| 267.084 | C <sub>11</sub> H <sub>16</sub> O <sub>6</sub> Na | 244.095 | 248,734                                 | 338,602                                | 0.55 | 0.28                                                | 1.34                                     |
| 267.120 | C <sub>12</sub> H <sub>20</sub> O <sub>5</sub> Na | 244.131 | 48,466                                  | 40,845                                 | 0.42 | 0.28                                                | 2.00                                     |
| 269.100 | C <sub>11</sub> H <sub>18</sub> O <sub>6</sub> Na | 246.110 | 232,300                                 | 177,791                                | 0.55 | 0.19                                                | 1.34                                     |
| 271.076 | C <sub>10</sub> H <sub>16</sub> O <sub>7</sub> Na | 248.090 | 1,006,870                               | 1,240,322                              | 0.70 | 0.11                                                | 0.50                                     |
| 273.095 | C <sub>10</sub> H <sub>18</sub> O <sub>7</sub> Na | 250.105 | 934,881                                 | 1,310,159                              | 0.70 | 0.02                                                | 0.50                                     |
| 285.095 | C <sub>11</sub> H <sub>18</sub> O <sub>7</sub> Na | 262.105 | 472,668                                 | 567,055                                | 0.64 | -0.49                                               | 0.30                                     |
| 286.053 | C <sub>9</sub> H <sub>13</sub> NO <sub>8</sub> Na | 263.064 | 1,116,433                               | 2,098,323                              | 0.89 | -0.53                                               | -1.09                                    |
| 287.074 | C <sub>10</sub> H <sub>16</sub> O <sub>8</sub> Na | 264.085 | 333,899                                 | 488,359                                | 0.80 | -0.57                                               | -0.65                                    |
| 289.089 | C <sub>10</sub> H <sub>18</sub> O <sub>8</sub> Na | 266.100 | 153,112                                 | 152,395                                | 0.80 | -0.66                                               | -0.65                                    |
| 297.095 | C <sub>12</sub> H <sub>18</sub> O <sub>7</sub> Na | 274.105 | 392,058                                 | 450,345                                | 0.58 | -1.00                                               | 0.07                                     |
| 309.095 | C <sub>13</sub> H <sub>18</sub> O <sub>7</sub> Na | 286.105 | 86,112                                  | 147,151                                | 0.54 | -1.51                                               | -0.17                                    |
| 319.115 | C <sub>15</sub> H <sub>20</sub> O <sub>6</sub> Na | 296.126 | 655,649                                 | 411,098                                | 0.40 | -1.93                                               | 0.17                                     |
| 335.110 | C <sub>15</sub> H <sub>20</sub> O <sub>7</sub> Na | 312.121 | 776,371                                 | 557,866                                | 0.47 | -2.61                                               | -0.72                                    |
| 337.105 | C <sub>18</sub> H <sub>18</sub> O <sub>5</sub> Na | 314.115 | 996,703                                 | 1,045,977                              | 0.28 | -2.70                                               | -0.10                                    |

Table S2. Measured mass-to-charge ratio ( $m/z$ ), suggested ion formula, calculated molecular weight (MW), measured total intensities of extracted ion chromatogram (EIC) peaks, calculated O/C ratio, and predicted saturation concentrations for products existing in SOA from TMB (continued).

| $m/z$   | Ion formula                                         | MW      | Total int. of EIC peaks (normal, run 1) | Total int. of EIC peaks (aging, run 2) | O/C  | $\log_{10} C^*$ (line fitted to molecular corridor) | $\log_{10} C^*$ (eq. by Li et al., 2016) |
|---------|-----------------------------------------------------|---------|-----------------------------------------|----------------------------------------|------|-----------------------------------------------------|------------------------------------------|
| 339.105 | C <sub>14</sub> H <sub>20</sub> O <sub>8</sub> Na   | 316.116 | 265,193                                 | 336,772                                | 0.57 | -2.78                                               | -1.44                                    |
| 351.105 | C <sub>15</sub> H <sub>20</sub> O <sub>8</sub> Na   | 328.116 | 478,275                                 | 419,619                                | 0.53 | -3.29                                               | -1.69                                    |
| 363.141 | C <sub>17</sub> H <sub>24</sub> O <sub>7</sub> Na   | 340.152 | 1,151,661                               | 576,982                                | 0.41 | -3.80                                               | -1.33                                    |
| 365.136 | C <sub>20</sub> H <sub>22</sub> O <sub>5</sub> Na   | 342.147 | 1,827,276                               | 1,925,906                              | 0.25 | -3.89                                               | -0.86                                    |
| 367.100 | C <sub>15</sub> H <sub>20</sub> O <sub>9</sub> Na   | 344.111 | 535,723                                 | 258,279                                | 0.60 | -3.97                                               | -2.71                                    |
| 369.116 | C <sub>15</sub> H <sub>22</sub> O <sub>9</sub> Na   | 346.126 | 405,546                                 | 425,047                                | 0.60 | -4.06                                               | -2.71                                    |
| 377.136 | C <sub>21</sub> H <sub>22</sub> O <sub>5</sub> Na   | 354.147 | 226,718                                 | 163,024                                | 0.24 | -4.40                                               | -1.24                                    |
| 379.136 | C <sub>17</sub> H <sub>24</sub> O <sub>8</sub> Na   | 356.147 | 926,647                                 | 423,039                                | 0.47 | -4.48                                               | -2.24                                    |
| 381.130 | C <sub>20</sub> H <sub>22</sub> O <sub>6</sub> Na   | 358.142 | 407,132                                 | 317,930                                | 0.30 | -4.57                                               | -1.55                                    |
| 383.095 | C <sub>15</sub> H <sub>20</sub> O <sub>10</sub> Na  | 360.106 | 317,655                                 | 130,575                                | 0.67 | -4.65                                               | -3.78                                    |
| 383.110 | C <sub>19</sub> H <sub>20</sub> O <sub>7</sub> Na   | 360.121 | 166,839                                 | 222,005                                | 0.37 | -4.65                                               | -1.98                                    |
| 391.136 | C <sub>18</sub> H <sub>24</sub> O <sub>8</sub> Na   | 368.147 | 1,323,695                               | 652,300                                | 0.44 | -4.99                                               | -2.53                                    |
| 393.152 | C <sub>18</sub> H <sub>26</sub> O <sub>8</sub> Na   | 370.163 | 2,818,500                               | 867,842                                | 0.44 | -5.08                                               | -2.53                                    |
| 395.131 | C <sub>17</sub> H <sub>24</sub> O <sub>9</sub> Na   | 372.142 | 611,129                                 | 535,442                                | 0.53 | -5.16                                               | -3.20                                    |
| 395.168 | C <sub>18</sub> H <sub>28</sub> O <sub>8</sub> Na   | 372.178 | 214,934                                 | 65,202                                 | 0.44 | -5.16                                               | -2.53                                    |
| 399.126 | C <sub>16</sub> H <sub>24</sub> O <sub>10</sub> Na  | 376.137 | 274,427                                 | 310,964                                | 0.63 | -5.33                                               | -3.99                                    |
| 407.135 | C <sub>18</sub> H <sub>24</sub> O <sub>9</sub> Na   | 384.142 | 694,004                                 | 514,558                                | 0.50 | -5.67                                               | -3.47                                    |
| 409.147 | C <sub>18</sub> H <sub>26</sub> O <sub>9</sub> Na   | 386.158 | 2,590,992                               | 1,650,003                              | 0.50 | -5.76                                               | -3.47                                    |
| 411.126 | C <sub>17</sub> H <sub>24</sub> O <sub>10</sub> Na  | 388.137 | 109,514                                 | 257,271                                | 0.59 | -5.84                                               | -4.21                                    |
| 411.141 | C <sub>21</sub> H <sub>24</sub> O <sub>7</sub> Na   | 388.152 | 599,344                                 | 399,801                                | 0.33 | -5.84                                               | -2.67                                    |
| 411.163 | C <sub>18</sub> H <sub>28</sub> O <sub>9</sub> Na   | 388.173 | 143,870                                 | 81,447                                 | 0.50 | -5.84                                               | -3.47                                    |
| 415.121 | C <sub>16</sub> H <sub>24</sub> O <sub>11</sub> Na  | 392.132 | 310,719                                 | 318,827                                | 0.69 | -6.01                                               | -5.08                                    |
| 425.142 | C <sub>18</sub> H <sub>26</sub> O <sub>10</sub> Na  | 402.153 | 1,153,390                               | 1,172,884                              | 0.56 | -6.44                                               | -4.46                                    |
| 427.158 | C <sub>18</sub> H <sub>28</sub> O <sub>10</sub> Na  | 404.168 | 706,196                                 | 562,726                                | 0.56 | -6.52                                               | -4.46                                    |
| 441.137 | C <sub>18</sub> H <sub>26</sub> O <sub>11</sub> Na  | 418.148 | 345,697                                 | 529,328                                | 0.61 | -7.12                                               | -5.49                                    |
| 441.152 | C <sub>22</sub> H <sub>26</sub> O <sub>8</sub> Na   | 418.163 | 633,244                                 | 273,278                                | 0.36 | -7.12                                               | -3.81                                    |
| 443.152 | C <sub>18</sub> H <sub>28</sub> O <sub>11</sub> Na  | 420.163 | 465,185                                 | 374,715                                | 0.61 | -7.20                                               | -5.49                                    |
| 457.132 | C <sub>18</sub> H <sub>26</sub> O <sub>12</sub> Na  | 434.142 | 158,391                                 | 226,223                                | 0.67 | -7.80                                               | -6.57                                    |
| 459.147 | C <sub>18</sub> H <sub>28</sub> O <sub>12</sub> Na  | 436.158 | 139,947                                 | 307,765                                | 0.67 | -7.88                                               | -6.57                                    |
| 472.143 | C <sub>18</sub> H <sub>27</sub> NO <sub>12</sub> Na | 449.153 | 1,616,158                               | 1,140,221                              | 0.67 | -8.44                                               | -7.02                                    |
| 475.142 | C <sub>18</sub> H <sub>28</sub> O <sub>13</sub> Na  | 452.153 | 371,298                                 | 395,561                                | 0.72 | -8.56                                               | -7.68                                    |
| 488.138 | C <sub>18</sub> H <sub>27</sub> NO <sub>13</sub> Na | 465.148 | 845,870                                 | 776,656                                | 0.72 | -9.12                                               | -7.74                                    |
| 504.132 | C <sub>18</sub> H <sub>27</sub> NO <sub>14</sub> Na | 481.143 | 271,311                                 | 426,529                                | 0.78 | -9.80                                               | -8.46                                    |

Table S3. SMILES code, SPARC saturation concentration, and molecular weight of measured or suggested products formed from the photooxidation of TMB.

| name                                    | SMILES                                        | log(C*/ $\mu\text{g m}^{-3}$ ) | MW    | ref.               |
|-----------------------------------------|-----------------------------------------------|--------------------------------|-------|--------------------|
| 3,5-dimethylbenzaldehyde                | <chem>O=CC1=CC(=CC(=C1)C)C</chem>             | 6.03                           | 134.2 | Smith et al., 1999 |
| 2,4,6-trimethylphenol                   | <chem>OC1=C(C=C(C=C1)C)C</chem>               | 5.14                           | 136.2 | Smith et al., 1999 |
| 3,5-dimethyl-3(2H)-2-furanone           | <chem>O=C1OC(=CC1)C</chem>                    | 6.32                           | 112.1 | Smith et al., 1999 |
| 3,5-dimethyl-5(2H)-2-furanone           | <chem>O=C1OC(C=C1)C</chem>                    | 6.36                           | 112.1 | Smith et al., 1999 |
| 3-methyl-5-methylidene-5(2H)-2-furanone | <chem>O=C1OC(=C)C=C1C</chem>                  | 5.02                           | 110.1 | Smith et al., 1999 |
| 2-methyl-4-oxo-2-pentenal               | <chem>O=CC(=CC(=O)C)C</chem>                  | 5.78                           | 112.1 | Smith et al., 1999 |
| citraconic anhydride                    | <chem>O=C(O1)C(C)=CC1=O</chem>                | 3.68                           | 112.1 | Smith et al., 1999 |
| methylglyoxal                           | <chem>O=CC(=O)C</chem>                        | 8.38                           | 72.1  | Smith et al., 1999 |
| TM135OXMUC                              | <chem>O=CC1(OC1C(=CC(=O)C)C)C</chem>          | 5.31                           | 168.2 | MCM v3.3.1         |
| C7M2CO5OOH                              | <chem>OOC(C(=O)C)C(=CC(=O)C)C</chem>          | 3.41                           | 172.2 | MCM v3.3.1         |
| C7M3CO                                  | <chem>CC(=O)C=C(C)C(=O)C(=O)C</chem>          | 4.47                           | 154.2 | MCM v3.3.1         |
| CH3CO2H                                 | <chem>CC(=O)O</chem>                          | 7.68                           | 60.1  | MCM v3.3.1         |
| CH3OOH                                  | <chem>COO</chem>                              | 7.83                           | 48.0  | MCM v3.3.1         |
| HCHO                                    | <chem>C=O</chem>                              | 9.86                           | 30.0  | MCM v3.3.1         |
| CH3OH                                   | <chem>CO</chem>                               | 8.41                           | 32.0  | MCM v3.3.1         |
| CH3NO3                                  | <chem>CON(=O)=O</chem>                        | 8.42                           | 77.0  | MCM v3.3.1         |
| CH3O2NO2                                | <chem>COON(=O)=O</chem>                       | 8.17                           | 93.0  | MCM v3.3.1         |
| CH3CO3H                                 | <chem>CC(=O)OO</chem>                         | 7.48                           | 76.1  | MCM v3.3.1         |
| PAN                                     | <chem>CC(=O)OON(=O)=O</chem>                  | 6.84                           | 121.0 | MCM v3.3.1         |
| MGLYOX                                  | <chem>O=CC(=O)C</chem>                        | 8.38                           | 72.1  | MCM v3.3.1         |
| MMALANHY                                | <chem>O=C1C=C(C)C(=O)O1</chem>                | 3.68                           | 112.1 | MCM v3.3.1         |
| MMALNHYOOH                              | <chem>CC1(OO)C(O)C(=O)OC1=O</chem>            | -0.05                          | 162.1 | MCM v3.3.1         |
| CO2H3CO3H                               | <chem>CC(=O)C(O)C(=O)OO</chem>                | 4.47                           | 134.1 | MCM v3.3.1         |
| HCOCO3H                                 | <chem>OOC(=O)C=O</chem>                       | 6.35                           | 90.0  | MCM v3.3.1         |
| HCOCO2H                                 | <chem>O=CC(=O)O</chem>                        | 8.55                           | 74.0  | MCM v3.3.1         |
| C4PAN6                                  | <chem>O=N(=O)OOC(=O)C(O)C(=O)C</chem>         | 3.20                           | 179.1 | MCM v3.3.1         |
| MMALNHY2OH                              | <chem>O=C1OC(=O)C(C)(O)C1O</chem>             | 0.82                           | 146.1 | MCM v3.3.1         |
| C5CODBCO3H                              | <chem>CC(=CC(=O)C)C(=O)OO</chem>              | 3.53                           | 144.1 | MCM v3.3.1         |
| C4MCODBPAN                              | <chem>O=N(=O)OOC(=O)C(=CC(=O)C)C</chem>       | 3.62                           | 189.1 | MCM v3.3.1         |
| C5CODBCO2H                              | <chem>CC(=O)C=C(C)C(=O)O</chem>               | 4.29                           | 128.1 | MCM v3.3.1         |
| CH3COCO2H                               | <chem>OC(=O)C(=O)C</chem>                     | 7.35                           | 88.1  | MCM v3.3.1         |
| C5CO234                                 | <chem>CC(=O)C(=O)C(=O)C</chem>                | 6.73                           | 114.1 | MCM v3.3.1         |
| C5CO234OOH                              | <chem>CC(=O)C(=O)C(=O)COO</chem>              | 3.41                           | 146.1 | MCM v3.3.1         |
| C5MDICARB                               | <chem>O=CC(=CC(=O)C)C</chem>                  | 5.78                           | 112.1 | MCM v3.3.1         |
| C6CO2OHOOH                              | <chem>OOC(C)(C=O)C(O)C(=O)C</chem>            | 3.26                           | 162.1 | MCM v3.3.1         |
| C5CO243OH                               | <chem>CC(=O)C(O)C(=O)C</chem>                 | 5.88                           | 116.1 | MCM v3.3.1         |
| C6CO2M2OH                               | <chem>O=CC(C)(O)C(O)C(=O)C</chem>             | 3.78                           | 146.1 | MCM v3.3.1         |
| C6CO3MOH                                | <chem>O=CC(C)(O)C(=O)C(=O)C</chem>            | 5.84                           | 144.1 | MCM v3.3.1         |
| C5COHOCO3H                              | <chem>OOC(=O)C(C)(O)C(=O)C(=O)C</chem>        | 4.27                           | 176.1 | MCM v3.3.1         |
| C4COMOHPAN                              | <chem>O=N(=O)OOC(=O)C(C)(O)C(=O)C(=O)C</chem> | 3.19                           | 221.1 | MCM v3.3.1         |
| CHOMOHCO3H                              | <chem>CC(O)(C=O)C(=O)OO</chem>                | 5.16                           | 134.1 | MCM v3.3.1         |
| MXYFUONE                                | <chem>CC1OC(=O)C(=C1)C</chem>                 | 6.36                           | 112.1 | MCM v3.3.1         |
| NMXYFUOOH                               | <chem>OOC1(C)C(=O)OC(C)C1ON(=O)=O</chem>      | 2.34                           | 207.1 | MCM v3.3.1         |
| C23O3MCHO                               | <chem>O=CC(C)OC(=O)C(=O)C</chem>              | 5.86                           | 144.1 | MCM v3.3.1         |
| C23O3MCO2H                              | <chem>CC(OC(=O)C(=O)C)C(=O)O</chem>           | 3.17                           | 160.1 | MCM v3.3.1         |
| C23O3MCOOH                              | <chem>CC(OC(=O)C(=O)C)OO</chem>               | 4.39                           | 148.1 | MCM v3.3.1         |
| ACECOCOCH3                              | <chem>CC(=O)OC(=O)C(=O)C</chem>               | 5.43                           | 130.1 | MCM v3.3.1         |
| ACCOCOMOHH                              | <chem>OOC(=O)C(=O)OC(=O)C</chem>              | 2.48                           | 162.1 | MCM v3.3.1         |
| CH3CHO                                  | <chem>CC=O</chem>                             | 8.98                           | 44.1  | MCM v3.3.1         |
| HCOCH2OOH                               | <chem>OOC(=O)O</chem>                         | 6.03                           | 76.1  | MCM v3.3.1         |
| GLYOX                                   | <chem>O=CC=O</chem>                           | 8.61                           | 58.0  | MCM v3.3.1         |
| HOCH2CHO                                | <chem>OCC=O</chem>                            | 6.87                           | 60.1  | MCM v3.3.1         |
| HOCH2CO2H                               | <chem>OCC(=O)O</chem>                         | 5.17                           | 76.1  | MCM v3.3.1         |
| HOCH2CO3H                               | <chem>OCC(=O)OO</chem>                        | 5.93                           | 92.1  | MCM v3.3.1         |
| C23O3MOH                                | <chem>CC(O)OC(=O)C(=O)C</chem>                | 5.53                           | 132.1 | MCM v3.3.1         |
| C23O3MCO3H                              | <chem>OOC(=O)C(C)OC(=O)C(=O)C</chem>          | 4.04                           | 176.1 | MCM v3.3.1         |
| C23O3MCPAN                              | <chem>O=N(=O)OOC(=O)C(C)OC(=O)C(=O)C</chem>   | 3.87                           | 221.1 | MCM v3.3.1         |
| MXYFUOOH                                | <chem>CC1(OO)C(O)C(C)OC1=O</chem>             | 1.34                           | 162.1 | MCM v3.3.1         |
| CO24C53OOH                              | <chem>OOC(C(=O)C)C(=O)C</chem>                | 5.06                           | 132.1 | MCM v3.3.1         |
| C7M2CO5OH                               | <chem>CC(=O)C=C(C)C(O)C(=O)C</chem>           | 4.12                           | 156.2 | MCM v3.3.1         |

Table S3. SMILES code, SPARC saturation concentration, and molecular weight of measured or suggested products formed from the photooxidation of TMB (continued).

| name                     | SMILES                                              | log(C*/ $\mu\text{g m}^{-3}$ ) | MW    | ref.                  |
|--------------------------|-----------------------------------------------------|--------------------------------|-------|-----------------------|
| TM135MUO2H               | <chem>CC(=O)C=C(C)C1OC1(C)C(=O)O</chem>             | 1.56                           | 184.2 | MCM v3.3.1            |
| TM135MUO3H               | <chem>OOC(=O)C1(C)OC1C(=CC(=O)C)C</chem>            | 3.51                           | 200.2 | MCM v3.3.1            |
| TM135MUPAN               | <chem>O=N(=O)OOC(=O)C1(C)OC1C(=CC(=O)C)C</chem>     | 3.32                           | 245.2 | MCM v3.3.1            |
| EPXMALKT                 | <chem>O=CC1(C)OC1C(=O)C</chem>                      | 6.39                           | 128.1 | MCM v3.3.1            |
| EPXMKTCO2H               | <chem>CC(=O)C1OC1(C)C(=O)O</chem>                   | 3.10                           | 144.1 | MCM v3.3.1            |
| EPXMKTCO3H               | <chem>CC1(OC1C(=O)C)C(=O)OO</chem>                  | 4.58                           | 160.1 | MCM v3.3.1            |
| EPXMKTPAN                | <chem>O=N(=O)OOC(=O)C1(C)OC1C(=O)C</chem>           | 4.41                           | 205.1 | MCM v3.3.1            |
| C3MDIALOOH               | <chem>OOC(C)(C=O)C=O</chem>                         | 5.68                           | 118.1 | MCM v3.3.1            |
| C3MDIALOH                | <chem>O=CC(C)(O)C=O</chem>                          | 6.74                           | 102.1 | MCM v3.3.1            |
| TM135MUOOH               | <chem>OOC(C)(C(O)C(=O)C)C1OC1(C)C=O</chem>          | 1.58                           | 218.2 | MCM v3.3.1            |
| TM135MUNO3               | <chem>O=CC1(C)OC1C(C)(ON(=O)=O)C(O)C(=O)C</chem>    | 2.47                           | 247.2 | MCM v3.3.1            |
| TM135MUOH                | <chem>O=CC1(C)OC1C(C)(O)C(O)C(=O)C</chem>           | 2.00                           | 202.2 | MCM v3.3.1            |
| TMBOOH                   | <chem>OOCc1cc(C)cc(C)c1</chem>                      | 4.18                           | 152.2 | MCM v3.3.1            |
| TMBCHO                   | <chem>O=Cc1cc(C)cc(C)c1</chem>                      | 6.03                           | 134.2 | MCM v3.3.1            |
| DMPHOOH                  | <chem>OOc1cc(C)cc(C)c1</chem>                       | 4.55                           | 138.2 | MCM v3.3.1            |
| DMPHOHNO2                | <chem>Cc1cc(C)c(N(=O)=O)c(O)c1</chem>               | 4.99                           | 167.2 | MCM v3.3.1            |
| MXOHNO2OOH               | <chem>OOC1(O)C(=CC2(C)OOC1(N(=O)=O)C2O)C</chem>     | -1.59                          | 249.2 | MCM v3.3.1            |
| TMBCO2H                  | <chem>Cc1cc(C)cc(c1)C(=O)O</chem>                   | 3.52                           | 150.2 | MCM v3.3.1            |
| TMBCO3H                  | <chem>OOC(=O)c1cc(C)cc(C)c1</chem>                  | 4.53                           | 166.2 | MCM v3.3.1            |
| TMBNO3                   | <chem>O=N(=O)OCc1cc(C)cc(C)c1</chem>                | 5.03                           | 181.2 | MCM v3.3.1            |
| TMBOH                    | <chem>OCc1cc(C)cc(C)c1</chem>                       | 4.67                           | 136.2 | MCM v3.3.1            |
| TM135BPOOH               | <chem>OOC1C(=CC2(C)OOC1(C)C2O)C</chem>              | 1.56                           | 202.2 | MCM v3.3.1            |
| TM135OBPOH               | <chem>CC1=CC2(C)OOC(C)(C1=O)C2O</chem>              | 4.99                           | 184.2 | MCM v3.3.1            |
| TM135BPN03               | <chem>O=N(=O)OC1C(=CC2(C)OOC1(C)C2O)C</chem>        | 3.11                           | 231.2 | MCM v3.3.1            |
| TM135BP2OH               | <chem>CC1=CC2(C)OOC(C)(C1O)C2O</chem>               | 2.31                           | 186.2 | MCM v3.3.1            |
| TM135BZOL                | <chem>Cc1cc(C)c(O)c(C)c1</chem>                     | 5.14                           | 136.2 | MCM v3.3.1            |
| NTM135LOOH               | <chem>OOC1(O)C(=CC2(C)OOC1(C)C2ON(=O)=O)C</chem>    | 0.99                           | 263.2 | MCM v3.3.1            |
| NTM135OLOH               | <chem>O=N(=O)OC1C2(C)OOC1(C)C(O)(O)C(=C2)C</chem>   | 1.20                           | 247.2 | MCM v3.3.1            |
| TM135OLOOH               | <chem>OOC1(O)C(=CC2(C)OOC1(C)C2O)C</chem>           | 0.05                           | 218.2 | MCM v3.3.1            |
| TM135OLOH                | <chem>OC1C2(C)OOC1(C)C(O)(O)C(=C2)C</chem>          | -0.03                          | 202.2 | MCM v3.3.1            |
| formic acid              | <chem>O=CO</chem>                                   | 8.15                           | 46.0  | Fisseha et al., 2004  |
| acetic acid              | <chem>CC(O)=O</chem>                                | 7.68                           | 60.1  | Fisseha et al., 2004  |
| pyruvic acid             | <chem>CC(C(O)=O)=O</chem>                           | 7.35                           | 88.1  | Fisseha et al., 2004  |
| lactic acid              | <chem>CC(C(O)=O)O</chem>                            | 5.51                           | 90.1  | Fisseha et al., 2004  |
| oxalic acid              | <chem>OC(C(O)=O)=O</chem>                           | 5.58                           | 90.0  | Fisseha et al., 2004  |
| malonic acid             | <chem>OC(CC(O)=O)=O</chem>                          | 1.83                           | 104.1 | Fisseha et al., 2004  |
| succinic acid            | <chem>OC(CCC(O)=O)=O</chem>                         | 2.86                           | 118.1 | Fisseha et al., 2004  |
| methyl maleic acid       | <chem>O=C(C(C)=CC(O)=O)O</chem>                     | 2.41                           | 130.1 | Fisseha et al., 2004  |
| maleic acid              | <chem>O=C(C=CC(O)=O)O</chem>                        | 2.20                           | 116.1 | Fisseha et al., 2004  |
| 3,5-dimethylbenzoic acid | <chem>CC1=CC(C(O)=O)=CC(C)=C1</chem>                | 3.52                           | 150.2 | Fisseha et al., 2004  |
| citric acid              | <chem>OC(CC(O)=O)(C(O)=O)CC(O)=O</chem>             | -4.29                          | 192.1 | Fisseha et al., 2004  |
| MW88                     | <chem>CC(C(O)=O)=O</chem>                           | 7.35                           | 88.1  | Sato et al., 2012     |
| MW128                    | <chem>CC(C(O)=O)=CC(C)=O</chem>                     | 4.29                           | 128.1 | Sato et al., 2012     |
| MW162                    | <chem>CC(C(O)C(C)=O)(O)C(O)=O</chem>                | 1.00                           | 162.1 | Sato et al., 2012     |
| MW170                    | <chem>CC(C(O)=O)=CC(C)=CC(O)=O</chem>               | 0.35                           | 170.2 | Sato et al., 2012     |
| MW174                    | <chem>CC(C1C(C(O)=O)C)(O1)C(O)=O</chem>             | -0.23                          | 174.2 | Sato et al., 2012     |
| MW184                    | <chem>CC(C1C(C)=CC(C)=O)(O1)C(O)=O</chem>           | 1.56                           | 184.2 | Sato et al., 2012     |
| MW186                    | <chem>CC(C1C(C)=CC(O)=O)(O1)C(O)=O</chem>           | -1.04                          | 186.2 | Sato et al., 2012     |
| MW190                    | <chem>CC(C(C(C(O)=O)C)=O)(O)C(O)=O</chem>           | -3.75                          | 190.2 | Sato et al., 2012     |
| MW192                    | <chem>CC(C(O)C(C(O)=O)C)(O)C(O)=O</chem>            | -1.16                          | 192.2 | Sato et al., 2012     |
| MW200                    | <chem>CC(C1C(C(C(O)=O)C)=O)(O1)C(O)=O</chem>        | 1.46                           | 200.2 | Sato et al., 2012     |
| MW202                    | <chem>CC(C(O)C(C)=CC(C)=O)(O)C(O)=O</chem>          | -0.28                          | 202.2 | Sato et al., 2012     |
| MW204                    | <chem>CC(C1C(C(O)C(O)=O)(O)C)(O1)C(O)=O</chem>      | -4.42                          | 220.2 | Sato et al., 2012     |
| MW216                    | <chem>CC(C1C(C(C(O)=O)C)=O)(O)C(O)C(O)=O</chem>     | -0.59                          | 216.2 | Sato et al., 2012     |
| MW218                    | <chem>CC(C1C(C(O)C(C)=O)(O)C)(O1)C(O)=O</chem>      | -1.49                          | 218.2 | Sato et al., 2012     |
| MW232                    | <chem>CC(C(C(C(C(O)=O)C)=O)(O)C)=O)(O)C(O)=O</chem> | -0.82                          | 232.2 | Sato et al., 2012     |
| MW234                    | <chem>CC(C(O)C(C(C(O)=O)C)=O)(O)C(O)C(O)=O</chem>   | -1.50                          | 234.2 | Sato et al., 2012     |
| glycolic acid            | <chem>OCC(O)=O</chem>                               | 5.17                           | 76.1  | Plapran et al., 2014  |
| butanoic acid            | <chem>CCCC(O)=O</chem>                              | 6.62                           | 88.1  | Plapran et al., 2014  |
| glyoxal 2-mer            | <chem>OC(C)(OC(C(C)=O)O1)C1O</chem>                 | 2.05                           | 162.1 | Kalberer et al., 2004 |

Table S3. SMILES code, SPARC saturation concentration, and molecular weight of measured or suggested products formed from the photooxidation of TMB (Continued).

| name                         | SMILES                                                                                                | log(C*/ $\mu\text{g m}^{-3}$ ) | MW    | ref.                  |
|------------------------------|-------------------------------------------------------------------------------------------------------|--------------------------------|-------|-----------------------|
| glyoxal 3-mer                | <chem>CC1(OC(C(C)=O)O2)C2OC(C(C)=O)O1</chem>                                                          | 4.56                           | 216.2 | Kalberer et al., 2004 |
| glyoxal 4-mer                | <chem>CC1(OC(C2(C)OC(O)C(C)(O)O2)O3)C3OC(C(C)=O)O1</chem>                                             | -1.27                          | 306.3 | Kalberer et al., 2004 |
| glyoxal 5-mer                | <chem>CC1(OC(C2(C)OC(O)C(C)(O)O2)O3)C3OC(C4(C)OC(C)(O)C(O)O4)O1</chem>                                | -7.53                          | 396.3 | Kalberer et al., 2004 |
| glyoxal 5-mer                | <chem>CC1(OC(C2(C)OC(OC(C(C)=O)O3)C3(C)O2)O4)C4OC(C(C)=O)O1</chem>                                    | 1.55                           | 360.3 | Kalberer et al., 2004 |
| glyoxal 6-mer                | <chem>CC1(OC(C2(C)OC(OC(C(C)=O)O3)C3(C)O2)O4)C4OC(C5(C)OC(C)(O)C(O)O5)O1</chem>                       | -4.60                          | 450.4 | Kalberer et al., 2004 |
| glyoxal 7-mer                | <chem>CC1(OC(C2(C)OC(OC(C(C)=O)O3)C3(C)O2)O4)C4OC(C5(C)OC6(C)C(OC(C(C)=O)O6)O5)O1</chem>              | -1.55                          | 504.4 | Kalberer et al., 2004 |
| glyoxal 8-mer                | <chem>CC1(OC(C2(C)OC(OC(C3(C)OC(O)C(C)(O)O3)O4)C4(C)O2)O5)C5OC(C6(C)OC7(C)C(OC(C(C)=O)O7)O6)O1</chem> | -7.91                          | 594.5 | Kalberer et al., 2004 |
| glyoxal 2-mer + benzaldehyde | <chem>CC12C(OC(C(C)=O)O2)OC(C3=CC(C)=CC(C)=C3)O1</chem>                                               | 2.37                           | 278.3 | Kalberer et al., 2004 |
| glyoxal 3-mer + benzaldehyde | <chem>CC12C(OC(C3(C)OC(O)C(C)(O)O3)O2)OC(C4=CC(C)=CC(C)=C4)O1</chem>                                  | -2.86                          | 368.4 | Kalberer et al., 2004 |
| glyoxal 4-mer + benzaldehyde | <chem>CC12C(OC(C3(C)OC4C(C)(OC(C(C)=O)O4)O3)O2)OC(C5=CC(C)=CC(C)=C5)O1</chem>                         | -0.97                          | 422.4 | Kalberer et al., 2004 |
| glyoxal 5-mer + benzaldehyde | <chem>CC12C(OC(C3(C)OC4C(C)(OC(C5(OC(O)C(C)(O)O5)C)O4)O3)O2)OC(C6=CC(C)=CC(C)=C6)O1</chem>            | -6.27                          | 512.5 | Kalberer et al., 2004 |
| glyoxal 6-mer + benzaldehyde | <chem>CC12C(OC(C3(C)OC4C(C)(OC(C5(OC6C(C)(OC(C(C)=O)O6)O5)C)O4)O3)O2)OC(C7=CC(C)=CC(C)=C7)O1</chem>   | -4.18                          | 566.6 | Kalberer et al., 2004 |
| glyoxal 2-mer + pyruvic acid | <chem>O=C(C1(OC(OC(C(C)=O)O2)C2(C)O1)C)O</chem>                                                       | 0.81                           | 232.2 | Kalberer et al., 2004 |
| glyoxal 3-mer + pyruvic acid | <chem>O=C(C1(OC(OC(C2(C)OC(O)C(C)(O)O2)O3)C3(C)O1)C)O</chem>                                          | -4.14                          | 322.3 | Kalberer et al., 2004 |
| glyoxal 4-mer + pyruvic acid | <chem>O=C(C1(OC(OC(C2(C)OC3C(C)(OC(C(C)=O)O3)O2)O4)C4(C)O1)C)O</chem>                                 | -2.28                          | 376.3 | Kalberer et al., 2004 |
| glyoxal 5-mer + pyruvic acid | <chem>O=C(C1(OC(OC(C2(C)OC3C(C)(OC(C4(C)OC(O)C(C)(O)O4)O3)O2)O5)C5(C)O1)C)O</chem>                    | -7.99                          | 466.4 | Kalberer et al., 2004 |
| glyoxal 6-mer + pyruvic acid | <chem>O=C(C1(OC(OC(C2(C)OC3C(C)(OC(C4(C)OC5C(C)(OC(C(C)=O)O5)O4)O3)O2)O6)C6(C)O1)C)O</chem>           | -5.52                          | 520.4 | Kalberer et al., 2004 |

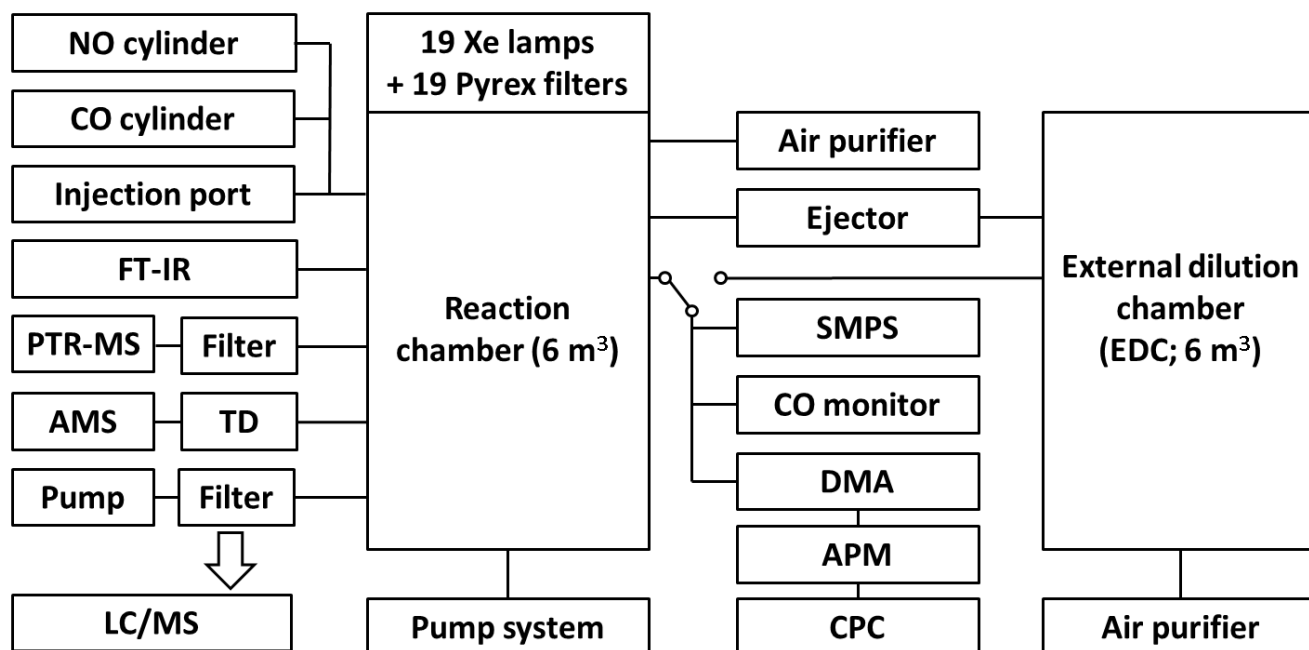

Figure S1. Schematic diagram of the chamber system and analytical instruments used in this study.



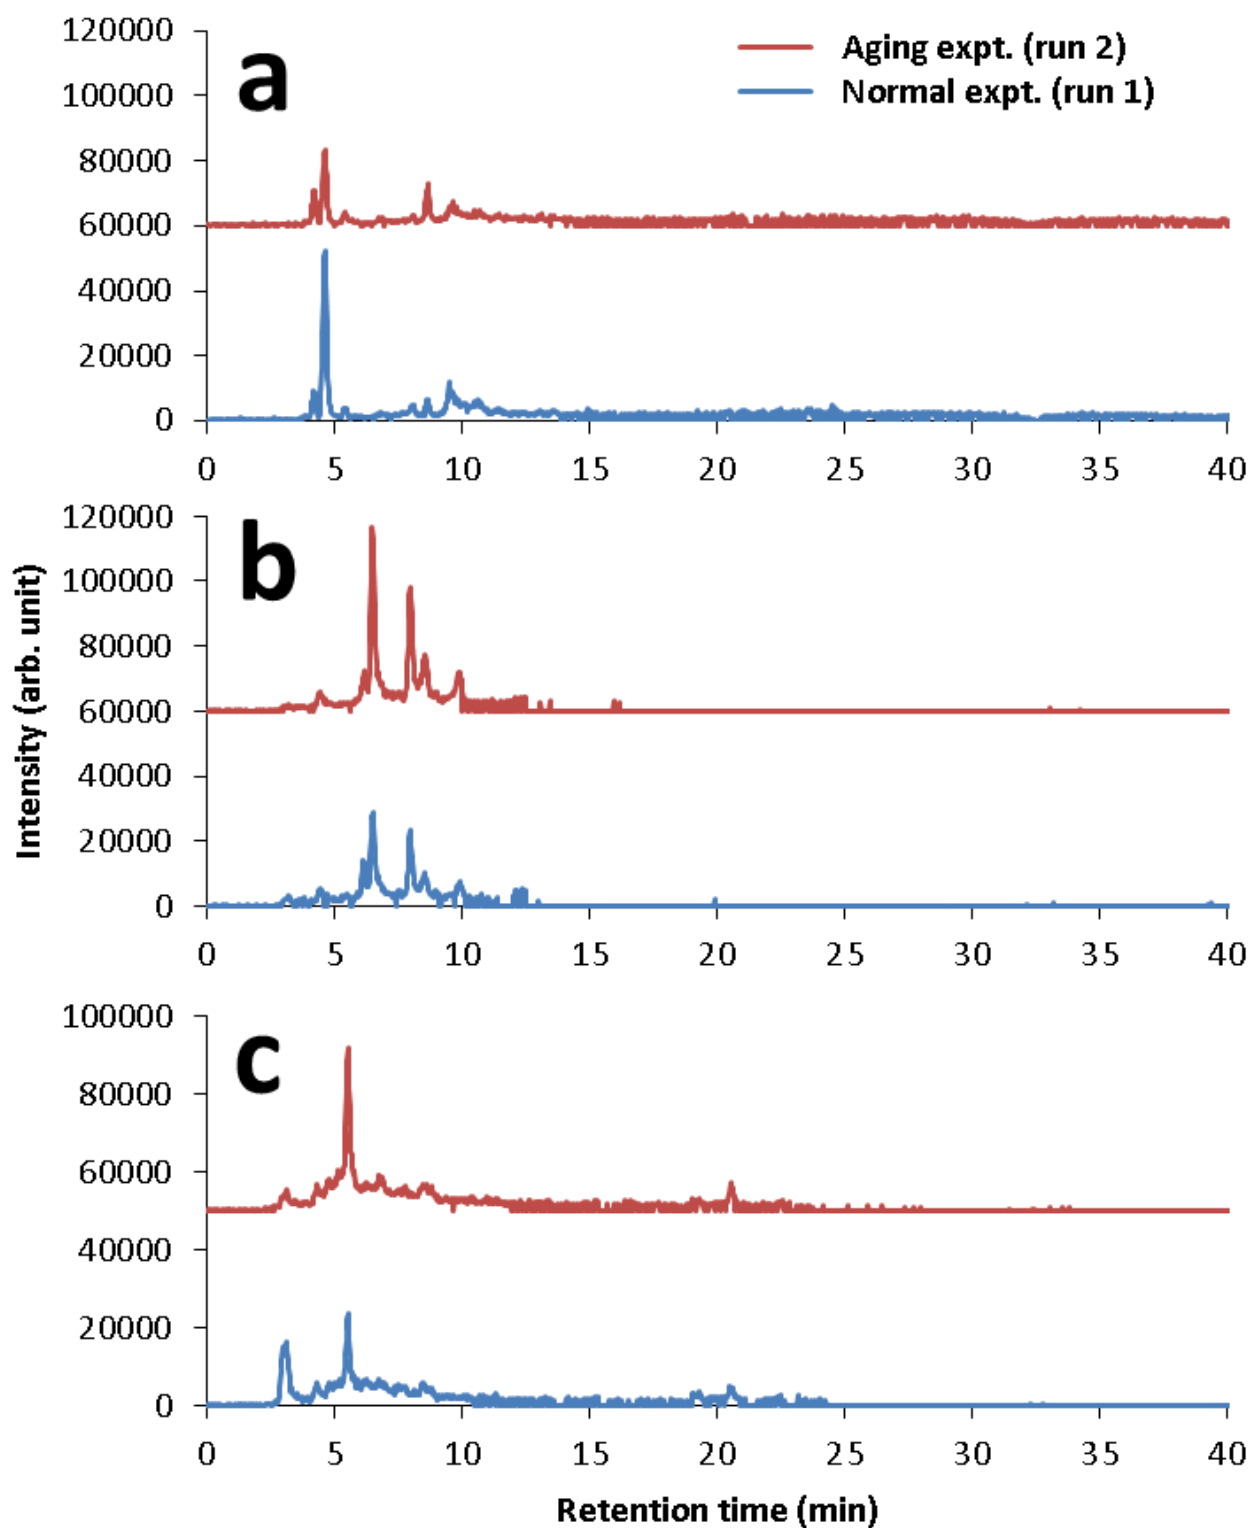

Figure S2. Extracted ion chromatograms observed for (a)  $C_9H_{14}O_4Na^+$ , (b)  $C_9H_{14}O_5Na^+$ , and (c)  $C_9H_{14}O_6Na^+$  by positive-mode LC/MS.

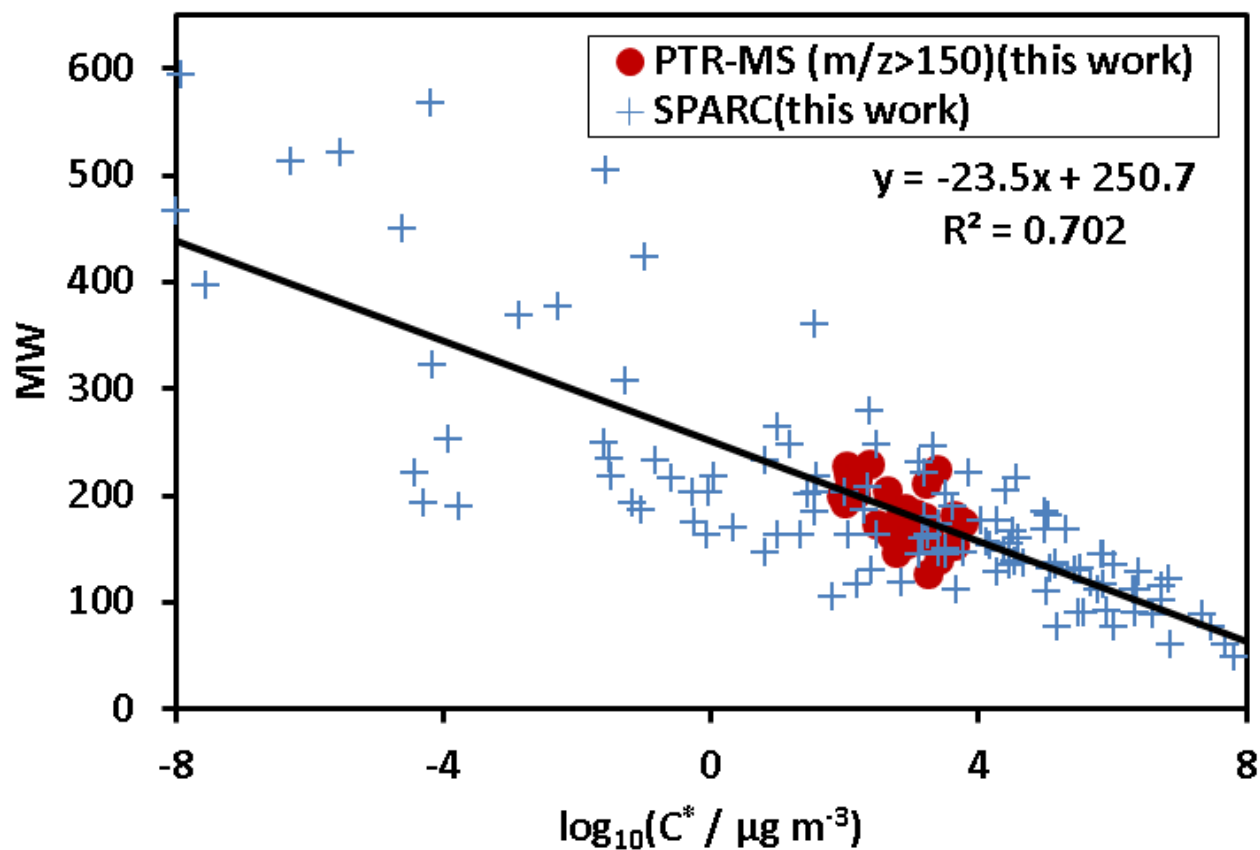

Figure S3. Molecular weight plotted as a function of saturation concentration for products formed from the photooxidation of TMB (molecular corridor).

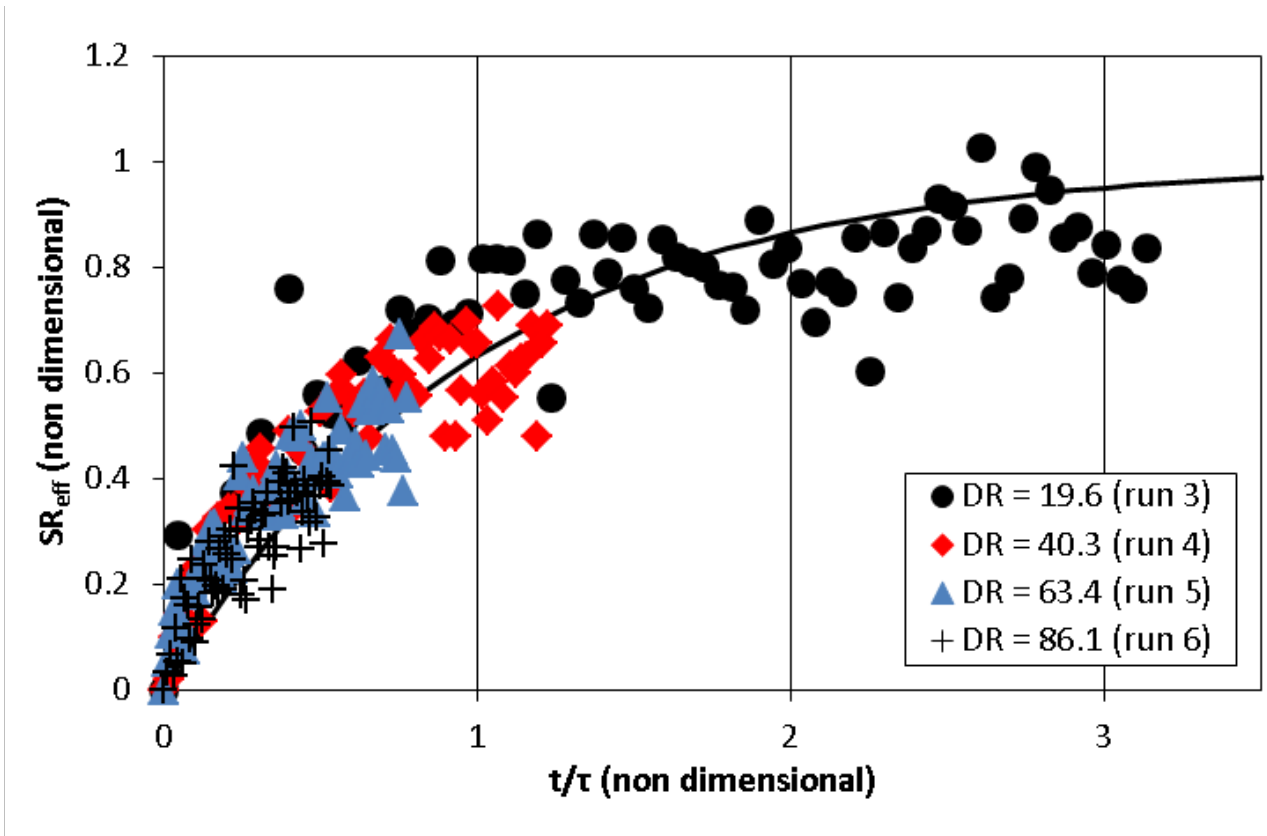

Figure S4. Effective saturation ratio ( $SR_{\text{eff}}$ ) plotted as a function of the ratio of time ( $t$ ) to equilibration timescale ( $\tau$ ).

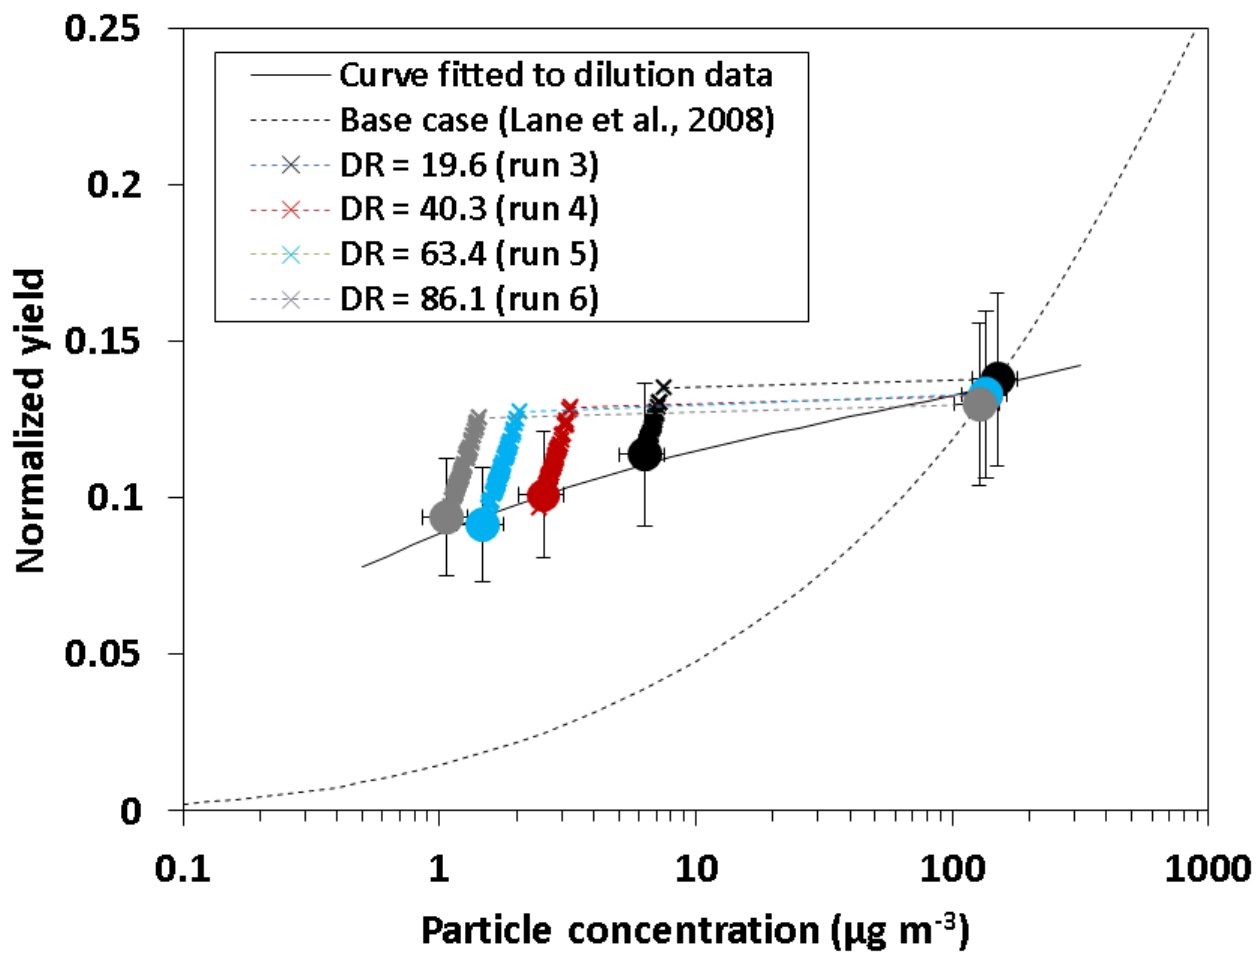

Figure S5. Normalized yield measured during dilution experiments as a function of particle concentration; circle symbols represent data observed before and 300 min after dilution.
